# Supplementary material for: Global Landscape of Organic Carbon and Total Nitrogen in the Soils of Oasis Ecosystems in Southern Tunisia
Source: MDPI journal article supplement (doi:10.3390/agronomy11101903), 2021-09-22
Supplement: s1 [file s1]

**Table S1.** Descriptive statistics of soil properties at the four sub-plots between 2020 and 2021 (n = 3).

| Depth (cm)         | 2020    |         |              |                    |          | 2021    |         |              |                    |          |
|--------------------|---------|---------|--------------|--------------------|----------|---------|---------|--------------|--------------------|----------|
|                    | Minimum | Maximum | Mean         | Standard Deviation | Variance | Minimum | Maximum | Mean         | Standard Deviation | Variance |
| <b>Barley (BA)</b> |         |         |              |                    |          |         |         |              |                    |          |
| <i>pH</i>          |         |         |              |                    |          |         |         |              |                    |          |
| 0-15               | 7.50    | 7.80    | 7.63 ± 0.09  | 0.15               | 0.02     | 7.50    | 7.70    | 7.60 ± 0.06  | 0.10               | 0.01     |
| 15-30              | 7.60    | 7.80    | 7.70 ± 0.06  | 0.10               | 0.01     | 7.50    | 7.60    | 7.57 ± 0.03  | 0.06               | 0.00     |
| 30-45              | 7.70    | 7.80    | 7.73 ± 0.03  | 0.06               | 0.00     | 7.70    | 7.90    | 7.77 ± 0.07  | 0.12               | 0.01     |
| 45-60              | 7.60    | 7.80    | 7.73 ± 0.07  | 0.12               | 0.01     | 7.70    | 7.80    | 7.77 ± 0.03  | 0.06               | 0.00     |
| <i>EC (mS/cm)</i>  |         |         |              |                    |          |         |         |              |                    |          |
| 0-15               | 2.60    | 5.30    | 3.80 ± 0.79  | 1.37               | 1.89     | 2.5     | 5.50    | 4.03 ± 0.87  | 1.5                | 2.25     |
| 15-30              | 2.30    | 5.60    | 3.67 ± 0.99  | 1.72               | 2.96     | 2.2     | 5.40    | 3.43 ± 0.99  | 1.72               | 2.96     |
| 30-45              | 2.40    | 3.90    | 3.30 ± 0.46  | 0.79               | 0.63     | 2.2     | 5.60    | 3.60 ± 01.03 | 1.78               | 3.16     |
| 45-60              | 4.40    | 5.90    | 5.07 ± 0.44  | 0.76               | 0.58     | 2.1     | 5.60    | 3.33 ± 01.13 | 1.97               | 3.86     |
| <i>C (%)</i>       |         |         |              |                    |          |         |         |              |                    |          |
| 0-15               | 1.43    | 1.45    | 1.44 ± 0.01  | 0.01               | 0.00     | 1.36    | 1.39    | 1.38 ± 0.01  | 0.02               | 0.00     |
| 15-30              | 1.10    | 1.15    | 1.13 ± 0.01  | 0.03               | 0.00     | 1.08    | 1.09    | 1.08 ± 0.00  | 0.01               | 0.00     |
| 30-45              | 0.86    | 0.90    | 0.88 ± 0.01  | 0.02               | 0.00     | 0.85    | 0.87    | 0.86 ± 0.01  | 0.01               | 0.00     |
| 45-60              | 0.30    | 0.33    | 0.32 ± 0.01  | 0.02               | 0.00     | 0.44    | 0.46    | 0.45 ± 0.01  | 0.01               | 0.00     |
| <i>N (%)</i>       |         |         |              |                    |          |         |         |              |                    |          |
| 0-15               | 0.08    | 0.10    | 0.09 ± 0.01  | 0.01               | 0.00     | 0.06    | 0.08    | 0.07 ± 0.01  | 0.01               | 0.00     |
| 15-30              | 0.07    | 0.09    | 0.08 ± 0.01  | 0.01               | 0.00     | 0.06    | 0.07    | 0.07 ± 0.00  | 0.01               | 0.00     |
| 30-45              | 0.08    | 0.09    | 0.09 ± 0.00  | 0.01               | 0.00     | 0.08    | 0.09    | 0.08 ± 0.00  | 0.01               | 0.00     |
| 45-60              | 0.05    | 0.07    | 0.06 ± 0.01  | 0.01               | 0.00     | 0.07    | 0.08    | 0.08 ± 0.00  | 0.01               | 0.00     |
| <i>C/N</i>         |         |         |              |                    |          |         |         |              |                    |          |
| 0-15               | 14.30   | 18.10   | 16.13 ± 1.10 | 1.90               | 3.62     | 17.40   | 22.70   | 19.93 ± 1.53 | 2.66               | 7.06     |
| 15-30              | 12.80   | 15.70   | 14.20 ± 0.84 | 1.45               | 2.11     | 15.40   | 18.20   | 16.33 ± 0.93 | 1.62               | 2.61     |
| 30-45              | 9.60    | 11.00   | 10.20 ± 0.42 | 0.72               | 0.52     | 9.60    | 10.90   | 10.37 ± 0.39 | 0.68               | 0.46     |
| 45-60              | 4.30    | 6.60    | 5.40 ± 0.67  | 1.15               | 1.33     | 5.60    | 6.30    | 5.90 ± 0.21  | 0.36               | 0.13     |
| <i>BD (g/cm³)</i>  |         |         |              |                    |          |         |         |              |                    |          |
| 0-15               | 1.45    | 1.50    | 1.48 ± 0.01  | 0.03               | 0.00     | 1.48    | 1.49    | 1.48 ± 0.00  | 0.01               | 0.00     |

|                     |       |       |              |      |      |      |        |              |      |      |
|---------------------|-------|-------|--------------|------|------|------|--------|--------------|------|------|
| 15-30               | 1.50  | 1.51  | 1.51 ± 0.00  | 0.01 | 0.00 | 1.53 | 1.54   | 1.54 ± 0.00  | 0.01 | 0.00 |
| 30-45               | 1.52  | 1.54  | 1.53 ± 0.01  | 0.01 | 0.00 | 1.55 | 1.56   | 1.55 ± 0.00  | 0.01 | 0.00 |
| 45-60               | 1.70  | 1.71  | 1.70 ± 0.00  | 0.01 | 0.00 | 1.70 | 1.72   | 1.71 ± 0.01  | 0.01 | 0.00 |
| <b>Alfalfa (AL)</b> |       |       |              |      |      |      |        |              |      |      |
| <i>pH</i>           |       |       |              |      |      |      |        |              |      |      |
| 0-15                | 7.30  | 7.50  | 7.40 ± 0.06  | 0.10 | 0.01 | 7.30 | 7.40   | 7.33 ± 0.03  | 0.06 | 0.00 |
| 15-30               | 7.50  | 7.60  | 7.53 ± 0.03  | 0.06 | 0.00 | 7.30 | 7.50   | 7.40 ± 0.06  | 0.10 | 0.01 |
| 30-45               | 7.50  | 7.70  | 7.60 ± 0.06  | 0.10 | 0.01 | 7.40 | 7.50   | 7.43 ± 0.03  | 0.06 | 0.00 |
| 45-60               | 7.70  | 7.80  | 7.76 ± 0.03  | 0.06 | 0.00 | 7.60 | 7.80   | 7.70 ± 0.06  | 0.10 | 0.01 |
| <i>EC (mS/cm)</i>   |       |       |              |      |      |      |        |              |      |      |
| 0-15                | 4.20  | 4.30  | 4.23 ± 0.03  | 0.06 | 0.00 | 3.80 | 3.90   | 3.83 ± 0.03  | 0.06 | 0.00 |
| 15-30               | 4.30  | 4.30  | 4.30 ± 0.00  | 0.00 | 0.00 | 3.40 | 4.10   | 3.73 ± 0.20  | 0.35 | 0.12 |
| 30-45               | 4.80  | 5.00  | 4.90 ± 0.06  | 0.10 | 0.01 | 4.60 | 4.90   | 4.77 ± 0.09  | 0.15 | 0.02 |
| 45-60               | 5.50  | 5.60  | 5.57 ± 0.03  | 0.06 | 0.00 | 5.10 | 5.20   | 5.13 ± 0.03  | 0.06 | 0.00 |
| <i>C (%)</i>        |       |       |              |      |      |      |        |              |      |      |
| 0-15                | 1.44  | 1.46  | 1.45 ± 0.01  | 0.01 | 0.00 | 1.55 | 1.56   | 1.56 ± 0.00  | 0.01 | 0.00 |
| 15-30               | 1.01  | 1.11  | 1.06 ± 0.03  | 0.05 | 0.00 | 1.36 | 1.46   | 1.39 ± 0.03  | 0.06 | 0.00 |
| 30-45               | 1.02  | 1.12  | 1.06 ± 0.03  | 0.05 | 0.00 | 0.72 | 0.88   | 0.81 ± 0.05  | 0.08 | 0.01 |
| 45-60               | 0.44  | 0.47  | 0.45 ± 0.01  | 0.02 | 0.00 | 0.40 | 0.46   | 0.43 ± 0.02  | 0.03 | 0.00 |
| <i>N (%)</i>        |       |       |              |      |      |      |        |              |      |      |
| 0-15                | 0.11  | 0.13  | 0.12 ± 0.01  | 0.01 | 0.00 | 0.13 | 0.16   | 0.14 ± 0.01  | 0.02 | 0.00 |
| 15-30               | 0.09  | 0.11  | 0.10 ± 0.01  | 0.01 | 0.00 | 0.18 | 0.22   | 0.20 ± 0.01  | 0.02 | 0.00 |
| 30-45               | 0.11  | 0.15  | 0.13 ± 0.01  | 0.02 | 0.00 | 0.17 | 0.20   | 0.18 ± 0.01  | 0.02 | 0.00 |
| 45-60               | 0.08  | 0.1   | 0.09 ± 0.01  | 0.01 | 0.00 | 0.09 | 0.12   | 0.10 ± 0.01  | 0.02 | 0.00 |
| <i>C/N</i>          |       |       |              |      |      |      |        |              |      |      |
| 0-15                | 11.20 | 13.20 | 12.13 ± 0.58 | 1.01 | 1.01 | 9.70 | 120.00 | 10.93 ± 0.67 | 1.16 | 1.34 |
| 15-30               | 9.20  | 12.30 | 10.33 ± 0.99 | 1.71 | 2.92 | 6.60 | 7.60   | 7.00 ± 0.31  | 0.53 | 0.28 |
| 30-45               | 7.50  | 9.50  | 8.27 ± 0.62  | 1.08 | 1.16 | 3.60 | 5.20   | 4.47 ± 0.47  | 0.81 | 0.65 |
| 45-60               | 4.70  | 5.60  | 5.07 ± 0.27  | 0.47 | 0.22 | 3.70 | 5.10   | 4.40 ± 0.40  | 0.70 | 0.49 |
| <i>BD (g/cm³)</i>   |       |       |              |      |      |      |        |              |      |      |
| 0-15                | 1.45  | 1.46  | 1.46 ± 0.00  | 0.01 | 0.00 | 1.44 | 1.46   | 1.45 ± 0.01  | 0.01 | 0.00 |
| 15-30               | 1.49  | 1.53  | 1.51 ± 0.01  | 0.02 | 0.00 | 1.52 | 1.54   | 1.53 ± 0.01  | 0.01 | 0.00 |
| 30-45               | 1.52  | 1.53  | 1.53 ± 0.00  | 0.01 | 0.00 | 1.65 | 1.66   | 1.66 ± 0.00  | 0.01 | 0.00 |
| 45-60               | 1.69  | 1.73  | 1.71 ± 0.02  | 0.02 | 0.00 | 1.70 | 1.72   | 1.71 ± 0.01  | 0.01 | 0.00 |

| Barley-Alfalfa (BA/AL) |       |       |              |      |      |       |      |              |      |      |
|------------------------|-------|-------|--------------|------|------|-------|------|--------------|------|------|
| <i>pH</i>              |       |       |              |      |      |       |      |              |      |      |
| 0-15                   | 7.20  | 7.30  | 7.24 ± 0.03  | 0.06 | 0.00 | 7.20  | 7.30 | 7.23 ± 0.03  | 0.06 | 0.00 |
| 15-30                  | 7.20  | 7.30  | 7.27 ± 0.03  | 0.06 | 0.00 | 7.00  | 7.10 | 7.07 ± 0.03  | 0.06 | 0.00 |
| 30-45                  | 7.20  | 7.30  | 7.23 ± 0.03  | 0.06 | 0.00 | 7.18  | 7.21 | 7.20 ± 0.01  | 0.02 | 0.00 |
| 45-60                  | 7.40  | 7.50  | 7.43 ± 0.03  | 0.06 | 0.00 | 7.10  | 7.20 | 7.17 ± 0.03  | 0.06 | 0.00 |
| <i>EC (mS/cm)</i>      |       |       |              |      |      |       |      |              |      |      |
| 0-15                   | 3.80  | 3.90  | 3.83 ± 0.03  | 0.06 | 0.00 | 2.40  | 2.50 | 2.43 ± 0.03  | 0.06 | 0.00 |
| 15-30                  | 3.80  | 3.80  | 3.80 ± 0.00  | 0.00 | 0.00 | 2.30  | 2.50 | 2.40 ± 0.06  | 0.1  | 0.01 |
| 30-45                  | 4.20  | 4.45  | 4.30 ± 0.08  | 0.13 | 0.02 | 2.90  | 3.70 | 3.33 ± 0.23  | 0.4  | 0.16 |
| 45-60                  | 4.60  | 4.80  | 4.73 ± 0.07  | 0.12 | 0.01 | 3.70  | 3.90 | 3.80 ± 0.06  | 0.1  | 0.01 |
| <i>C (%)</i>           |       |       |              |      |      |       |      |              |      |      |
| 0-15                   | 1.86  | 1.88  | 1.87 ± 0.01  | 0.01 | 0.00 | 3.88  | 4.12 | 3.96 ± 0.08  | 0.14 | 0.02 |
| 15-30                  | 1.60  | 1.66  | 1.64 ± 0.02  | 0.03 | 0.00 | 2.16  | 3.17 | 2.51 ± 0.33  | 0.57 | 0.33 |
| 30-45                  | 1.36  | 1.38  | 1.37 ± 0.01  | 0.01 | 0.00 | 1.44  | 1.45 | 1.44 ± 0.00  | 0.01 | 0.00 |
| 45-60                  | 0.77  | 0.79  | 0.78 ± 0.01  | 0.01 | 0.00 | 0.86  | 0.90 | 0.88 ± 0.01  | 0.02 | 0.00 |
| <i>N (%)</i>           |       |       |              |      |      |       |      |              |      |      |
| 0-15                   | 0.13  | 0.14  | 0.14 ± 0.00  | 0.01 | 0.00 | 0.32  | 0.34 | 0.33 ± 0.01  | 0.01 | 0.00 |
| 15-30                  | 0.18  | 0.21  | 0.20 ± 0.01  | 0.02 | 0.00 | 0.22  | 0.24 | 0.23 ± 0.01  | 0.01 | 0.00 |
| 30-45                  | 0.18  | 0.19  | 0.18 ± 0.00  | 0.01 | 0.00 | 0.17  | 0.22 | 0.20 ± 0.02  | 0.03 | 0.00 |
| 45-60                  | 0.17  | 0.18  | 0.17 ± 0.00  | 0.01 | 0.00 | 0.15  | 0.20 | 0.18 ± 0.01  | 0.03 | 0.00 |
| <i>C/N</i>             |       |       |              |      |      |       |      |              |      |      |
| 0-15                   | 13.40 | 14.30 | 13.70 ± 0.30 | 0.52 | 0.27 | 11.80 | 12.1 | 12.00 ± 0.10 | 0.17 | 0.03 |
| 15-30                  | 7.90  | 9.20  | 8.37 ± 0.42  | 0.72 | 0.52 | 9.20  | 14.4 | 11.00 ± 1.70 | 2.95 | 8.68 |
| 30-45                  | 7.20  | 7.70  | 7.50 ± 0.15  | 0.26 | 0.07 | 6.50  | 8.50 | 7.40 ± 0.59  | 1.01 | 1.03 |
| 45-60                  | 4.40  | 4.60  | 4.50 ± 0.06  | 0.10 | 0.01 | 4.30  | 6.00 | 5.07 ± 0.50  | 0.86 | 0.74 |
| <i>BD (g/cm³)</i>      |       |       |              |      |      |       |      |              |      |      |
| 0-15                   | 1.43  | 1.44  | 1.44 ± 0.00  | 0.01 | 0.00 | 1.40  | 1.44 | 1.42 ± 0.01  | 0.02 | 0.00 |
| 15-30                  | 1.40  | 1.48  | 1.44 ± 0.02  | 0.04 | 0.00 | 1.42  | 1.44 | 1.43 ± 0.01  | 0.01 | 0.00 |
| 30-45                  | 1.51  | 1.58  | 1.54 ± 0.02  | 0.04 | 0.00 | 1.46  | 1.56 | 1.50 ± 0.03  | 0.05 | 0.00 |
| 45-60                  | 1.58  | 1.73  | 1.67 ± 0.05  | 0.08 | 0.01 | 1.54  | 1.89 | 1.71 ± 0.10  | 0.18 | 0.03 |
| Fallow (FA)            |       |       |              |      |      |       |      |              |      |      |
| <i>pH</i>              |       |       |              |      |      |       |      |              |      |      |
| 0-15                   | 7.70  | 7.78  | 7.74 ± 0.02  | 0.04 | 0.00 | 7.65  | 7.72 | 7.69 ± 0.02  | 0.04 | 0.00 |

|                              |      |       |                  |      |      |      |      |                  |      |      |
|------------------------------|------|-------|------------------|------|------|------|------|------------------|------|------|
| 15-30                        | 7.60 | 7.80  | $7.72 \pm 0.06$  | 0.11 | 0.01 | 7.60 | 7.74 | $7.68 \pm 0.04$  | 0.07 | 0.01 |
| 30-45                        | 7.70 | 7.88  | $7.80 \pm 0.05$  | 0.09 | 0.01 | 7.70 | 7.77 | $7.74 \pm 0.02$  | 0.04 | 0.00 |
| 45-60                        | 7.80 | 7.89  | $7.85 \pm 0.03$  | 0.05 | 0.00 | 7.80 | 7.86 | $7.83 \pm 0.02$  | 0.03 | 0.00 |
| <i>EC (mS/cm)</i>            |      |       |                  |      |      |      |      |                  |      |      |
| 0-15                         | 4.20 | 4.40  | $4.30 \pm 0.06$  | 0.10 | 0.01 | 2.50 | 5.60 | $4.23 \pm 0.91$  | 1.58 | 2.50 |
| 15-30                        | 3.80 | 5.10  | $4.26 \pm 0.42$  | 0.72 | 0.52 | 2.80 | 4.80 | $4.07 \pm 0.64$  | 1.10 | 1.21 |
| 30-45                        | 4.50 | 4.90  | $4.76 \pm 0.13$  | 0.23 | 0.05 | 3.40 | 5.20 | $4.37 \pm 0.52$  | 0.91 | 0.82 |
| 45-60                        | 5.90 | 7.60  | $6.76 \pm 0.49$  | 0.85 | 0.72 | 5.60 | 6.80 | $6.07 \pm 0.37$  | 0.64 | 0.41 |
| <i>C (%)</i>                 |      |       |                  |      |      |      |      |                  |      |      |
| 0-15                         | 0.76 | 0.88  | $0.82 \pm 0.03$  | 0.06 | 0.00 | 0.68 | 0.77 | $0.72 \pm 0.03$  | 0.05 | 0.00 |
| 15-30                        | 0.58 | 0.66  | $0.61 \pm 0.2$   | 0.04 | 0.00 | 0.61 | 0.66 | $0.64 \pm 0.01$  | 0.03 | 0.00 |
| 30-45                        | 0.50 | 0.54  | $0.52 \pm 0.01$  | 0.02 | 0.00 | 0.41 | 0.46 | $0.44 \pm 0.01$  | 0.03 | 0.00 |
| 45-60                        | 0.25 | 0.33  | $0.29 \pm 0.02$  | 0.04 | 0.00 | 0.25 | 0.32 | $0.29 \pm 0.02$  | 0.04 | 0.00 |
| <i>N (%)</i>                 |      |       |                  |      |      |      |      |                  |      |      |
| 0-15                         | 0.08 | 0.08  | $0.08 \pm 0.00$  | 0.00 | 0.00 | 0.05 | 0.05 | $0.05 \pm 0.00$  | 0.00 | 0.00 |
| 15-30                        | 0.06 | 0.06  | $0.06 \pm 0.00$  | 0.00 | 0.00 | 0.05 | 0.06 | $0.06 \pm 0.00$  | 0.01 | 0.00 |
| 30-45                        | 0.06 | 0.07  | $0.07 \pm 0.00$  | 0.01 | 0.00 | 0.05 | 0.07 | $0.06 \pm 0.00$  | 0.01 | 0.00 |
| 45-60                        | 0.05 | 0.07  | $0.06 \pm 0.01$  | 0.01 | 0.00 | 0.06 | 0.06 | $0.06 \pm 0.00$  | 0.00 | 0.00 |
| <i>C/N</i>                   |      |       |                  |      |      |      |      |                  |      |      |
| 0-15                         | 9.50 | 11.00 | $10.43 \pm 0.47$ | 0.81 | 0.66 | 13.6 | 14.8 | $14.27 \pm 0.35$ | 0.61 | 0.37 |
| 15-30                        | 9.70 | 10.60 | $10.10 \pm 0.26$ | 0.46 | 0.21 | 10.5 | 12.9 | $11.30 \pm 0.80$ | 1.39 | 1.92 |
| 30-45                        | 7.00 | 9.00  | $7.87 \pm 0.59$  | 1.03 | 1.05 | 6.70 | 7.70 | $7.30 \pm 0.31$  | 0.53 | 0.28 |
| 45-60                        | 3.50 | 5.60  | $4.87 \pm 0.68$  | 1.18 | 1.40 | 4.20 | 5.20 | $4.87 \pm 0.33$  | 0.58 | 0.33 |
| <i>BD (g/cm<sup>3</sup>)</i> |      |       |                  |      |      |      |      |                  |      |      |
| 0-15                         | 1.55 | 1.61  | $1.57 \pm 0.02$  | 0.03 | 0.00 | 1.55 | 1.60 | $1.57 \pm 0.02$  | 0.03 | 0.00 |
| 15-30                        | 1.54 | 1.55  | $1.54 \pm 0.00$  | 0.01 | 0.00 | 1.54 | 1.66 | $1.58 \pm 0.04$  | 0.07 | 0.00 |
| 30-45                        | 1.60 | 1.62  | $1.61 \pm 0.01$  | 0.01 | 0.00 | 1.57 | 1.70 | $1.65 \pm 0.04$  | 0.07 | 0.00 |
| 45-60                        | 1.70 | 1.73  | $1.72 \pm 0.01$  | 0.02 | 0.00 | 1.70 | 1.75 | $1.72 \pm 0.02$  | 0.03 | 0.00 |
